# Supplementary material
Source: publisher site journal article supplement (https://www.dovepress.com/article/245391)
Supplement: Supplementary file 1 [file get_supplementary_file.php]

السلام عليكم ورحمة الله وبركاته،،

أسعد الله أوقاتكم بكل خير،،

الإستبيان المرفق هو جزء من دراسة لفهم الإدراك العام تجاه الإعلان المرئي للأدوية المختلفة التي لا تستلزم وصفة طبية و إلى إستطلاع أثر الإعلانات الدوائية المرئيةعلى سلوك المستهلك نحو شراء الأدوية اللاوصفية لمرض ارتجاع المريء. لذلك أرجو منكم التكرم بالإجابة على الأسئلة التالية نظراً لإيماننا العميق بأهمية وجهات نظركم حول الموضوع وبأن نجاح هذا العمل هو متوقف على مشاركتكم في الإستبيان. من أجل ذلك أتمنى منكم التعاون معنا بالإجابة على الأسئلة أدناه ولكم منا خالص الشكر والتقدير.

سنقوم بسؤالك أولاً مجموعة من الأسئلة ثم سنكرر سؤالك نفس الأسئلة بعد إطلاعك على فيديو قصير يحتوي معلومات تعريفية طبية ودوائية .

**العمر ؟**

...................سنة.

**الجنس؟**

ذكر

.

أنثى

.

**ما هو مستواك التعليمي؟**

لا أقرأ ولا أكتب

ابتدائي

متوسط

ثانوي

جامعي

ماجستير او ما يعادلها

دكتوراه أو ما يعادلها

**هل تعمل في المجال الصحي؟**

نعم

لا

**دخلك الشهري هو (للفرد)؟**

- أقل من 3000 ريال
- 3000-6000 ريال.
- 6000-9000 ريال
- 9000-12000 ريال
- 12000-15000 ريال
- 15000-18000 ريال
- 15000-21000 ريال
- أكثر من 21000 ريال

**هل تعاني من أي أمراض مزمنة: (يمكنك الاختيار أكثر من خيار)**

- مرض السكري.
- ارتفاع ضغط الدم.
- ارتفاع نسبة الدهون في الدم.
- أمراض قلب كالذبحة الصدرية، تصلب الشرايين، وفشل القلب.
- قرحة معّدية أو تقرح في الأمعاء.
- ارتجاع المريء.
- أي أمراض أخرى:__________________________

**إذا كنت تعاني من أي امراض ماهي الادوية التي تستخدمها باستمرار (ادوية السكر، ادوية الضغط) اذكرها؟**

1. ..................................................................................................................................
2. ..................................................................................................................................
3. ..................................................................................................................................
4. ..................................................................................................................................
5. ..................................................................................................................................
6. ..................................................................................................................................
7. ..................................................................................................................................
8. ...................................................................................................................................

**هل تستخدم أي مستحضرات عشبية او مكملات غذائية، اذكرها؟**

1. . ..................................................................................................................................
2. ..................................................................................................................................
3. ..................................................................................................................................
4. ..................................................................................................................................

**هل سبق أن استخدمت اي دواء لإرتجاع المريء؟**  (...)نعم (...)لا

**إن كانت إجابتك بنعم، ما هو هذا الدواء؟_____________________**

**ما مدى تكرار هذه الأعراض:**

- أكثر من مرة في الأسبوع
- مره كل أسبوعين
- كل شهرمرة

**قبل الفيديو الإعلاني**

**ما هو مرض ارتجاع المريء (الحرقان) برأيك؟**

- هو عبارة عن ارتداد الحمض المعدي (المعدة) للمريء مسبباً تلفاً في الأغشية المخاطية للمريء وأعراضه الأساسية هي حموضة (حرقة في أعلى المعدة) ، الغثيان، التقيؤ، وألماً في الصدر.
- هو عبارة عن التهاب بكتيري معدي يسبب احساساً بالحرقة في المريء والماً في الصدر.
- هو عبارة عن التهاب في اللثة يسبب افرازاً لمادة شديدة الحموضة في الفم والماً في المريء وأعلى المعدة نتيجة ارتفاع نسبة الحموضة في المريء.
- هو عبارة عن مرض وراثي يسبب ارتفاعاً في نسبة الحموضة بأعلى المعدة وتسرباً لهذا الحمض للمريء مسبباً الماً في الصدر واحساساً بالحرقة.

**ماهي الأدوية المستخدمة في علاج ارتجاع المريء:**

- مثبطات مضخة البروتون مثل أوميبرازول، ازوميبرازول (نيكسيوم) ومضادات الهستامين من النوع الثاني مثل رانيتادين (زانتاك).
- مسكنات مثل ايبوبروفين (بروفين)والبرستامول (فيفادول او البنادول).
- مسهلات لعلاج الإمساك.
- مضادات حيوية للقضاء على البكتيريا.

**ماهي الأعراض الجانبية لمثبطات مضخة البروتون مثل اوميبرازول أو النكسيوم:**

- الصداع والغثيان وألم البطن والإسهال.
- فقدان الشهية
- الشعور بالجوع
- النعاس والدوخة
- انخفاض السكر

الإدراك العام تجاه الإعلان المرئي للأدوية اللاوصفية:

| العبارات أو الفقرات | موافق بشدة | موافق | محايد | غير موافق | غير موافق بشدة |
| --- | --- | --- | --- | --- | --- |
| الإعلان المرئي هو أول أداة تعريفية للدواء لتعريف المجتمع عن منافع ومخاطر الدواء | 🞎 | 🞎 | 🞎 | 🞎 | 🞎 |
| الإعلان المرئي يعتبر أحد مصادر المعلومات الموثوق بها للتعريف عن الأدوية اللاوصفية (لا تحتاج لوصفة طبية) | 🞎 | 🞎 | 🞎 | 🞎 | 🞎 |
| طريقة عرض الإعلان بفيديو قصير وبسيط تلفت نظري وتجذب اهتمامي في الإعلانات الدوائية اللاوصفية (لا تحتاج لوصفة طبية) وتزيد من فرصة شرائي للأدوية اللاوصفية | 🞎 | 🞎 | 🞎 | 🞎 | 🞎 |
| إعجابي بالإعلان المرئي حول منتج معين، من حيث طريقة تقديمه و عرضه قد يدفعني الى تغيير اعتقادي بشأن الدواء | 🞎 | 🞎 | 🞎 | 🞎 | 🞎 |
| قراراي الشراء لدي مستقل ولا يتأثر بأي عامل من العوامل كالإعلان المرئي | 🞎 | 🞎 | 🞎 | 🞎 | 🞎 |
| كلما زادت الإعلانات زادت فرصة شرائي للمنتج الدوائي | 🞎 | 🞎 | 🞎 | 🞎 | 🞎 |

**بعد الفيديو الإعلاني**

- هو عبارة عن ارتداد الحمض المعدي (المعدة) للمريء مسبباً تلفاً في الأغشية المخاطية للمريء وأعراضه الأساسية هي حموضة (حرقة في أعلى المعدة) ، الغثيان، التقيؤ، وألماً في الصدر.
- هو عبارة عن التهاب بكتيري معدي يسبب احساساً بالحرقة في المريء والماً في الصدر.
- هو عبارة عن التهاب في اللثة يسبب افرازاً لمادة شديدة الحموضة في الفم والماً في المريء وأعلى المعدة نتيجة ارتفاع نسبة الحموضة في المريء.
- هو عبارة عن مرض وراثي يسبب ارتفاعاً في نسبة الحموضة بأعلى المعدة وتسرباً لهذا الحمض للمريء مسبباً الماً في الصدر واحساساً بالحرقة.

**ماهي الأدوية المستخدمة في علاج ارتجاع المريء:**

- مثبطات مضخة البروتون مثل أوميبرازول، ازوميبرازول (نيكسيوم) ومضادات الهستامين من النوع الثاني مثل رانيتادين (زانتاك).
- مسكنات مثل ايبوبروفين (بروفين)والبرستامول (فيفادول او البنادول).
- مسهلات لعلاج الإمساك.
- مضادات حيوية للقضاء على البكتيريا.

**ماهي الأعراض الجانبية لمثبطات مضخة البروتون مثل اوميبرازول أو النكسيوم:**

- الصداع والغثيان وألم البطن والإسهال.
- فقدان الشهية
- الشعور بالجوع
- النعاس والدوخة
- انخفاض السكر

**الإدراك العام تجاه الإعلان المرئي للأدوية اللاوصفية:**

| العبارات أو الفقرات | موافق بشدة | موافق | محايد | غير موافق | غير موافق بشدة |
| --- | --- | --- | --- | --- | --- |
| الإعلان المرئي هو أول أداة تعريفية للدواء لتعريف المجتمع عن منافع ومخاطر الدواء | 🞎 | 🞎 | 🞎 | 🞎 | 🞎 |
| الإعلان المرئي يعتبر أحد مصادر المعلومات الموثوق بها للتعريف عن الأدوية اللاوصفية (لا تحتاج لوصفة طبية) | 🞎 | 🞎 | 🞎 | 🞎 | 🞎 |
| طريقة عرض الإعلان بفيديو قصير وبسيط تلفت نظري وتجذب اهتمامي في الإعلانات الدوائية اللاوصفية (لا تحتاج لوصفة طبية) وتزيد من فرصة شرائي للأدوية اللاوصفية | 🞎 | 🞎 | 🞎 | 🞎 | 🞎 |
| إعجابي بالإعلان المرئي حول منتج معين، من حيث طريقة تقديمه و عرضه قد يدفعني الى تغيير اعتقادي بشأن الدواء | 🞎 | 🞎 | 🞎 | 🞎 | 🞎 |
| قراراي الشراء لدي مستقل ولا يتأثر بأي عامل من العوامل كالإعلان المرئي | 🞎 | 🞎 | 🞎 | 🞎 | 🞎 |
| كلما زادت الإعلانات زادت فرصة شرائي للمنتج الدوائي | 🞎 | 🞎 | 🞎 | 🞎 | 🞎 |

Greetings,

We are conducting a study to explore the public perception of direct to consumer advertisement (DTCAs) of the over the counter (OTC) drugs and we would like to take 10-15 minutes from your precious time. If you consent to participate we would like you to sign the consent form that will be provided to you once we get your verbal approval. We will ask you a set of questions about DTCAs on OTC drugs for gastroesophageal reflux disease (GERD). Then, we will show you a motion graphic video and we will ask you the same questions again after you are done watching the video.

- **Your age**………
- **Gender:**
  - Male.
  - Female.
- **Please indicate the highest level of education you have completed:**
  - No formal education
  - Elementary school
  - Intermediate school
  - Secondary school
  - Bachelor degree
  - Master degree
  - Doctoral degree
- **Do you work in the health field?**
  - Yes
  - No
- **Please indicate your total income range per month:**
  - Less than SR 3000
  - SR 3000-6000
  - SR 6000-9000
  - SR 9000-12000
  - SR 12000-15000
  - SR 15,000-18,000
  - SR 18000-21000
  - SR 21000-24000
  - SR 24000-27000
  - SR 27000-30000
- **Please indicate if you have been diagnosed with one or more of the following diseases (you may select more than one option):**
  - Diabetes.
  - High blood pressure.
  - High cholesterol level.
  - Heart diseases, such as angina, atherosclerosis, and heart failure
  - Gastric or duodenal ulcers.
  - Gastroesophageal reflux disease (GERD).
  - Any other diseases: __________________________
- **If you have been diagnosed with any diseases please tell us what medications are you using (e.g., diabetes medications, pressure medications).**
  - **…………………………………………………………………………………………..**
- **Do you use over-the-counter medications for headache, colds, seasonal allergies or any other indications?** **Please name them and how often do you use them?**
  - **……………………………………………………………………………………………**
- **Do you use any herbal or dietary supplements? If yes, please tell us what supplements are you using?**
  - **……………………………………………………………………………………………**
- **If you have been diagnosed with gastroesophageal reflux disease, do you use any medication to manage it?**
  - Yes.
  - No.
- **If yes, what medication are you using?** _____________________
- **How often do you these symptoms:**
  - More than once a week
  - Once every two weeks.
  - Once every month.
  - Other:……………………

**Before the advertising video (The same questions and statements were repeated after the video)**

1. **What is the gastroesophageal reflux disease (GERD)?**
   1. It is the flow of stomach acid back into the esophagus and this reflux can cause irritation of the lining of the esophagus.
   2. It is a disease that occurs when certain bacteria cause an infection in the stomach and causes severe chest pain.
   3. It is the damage of esophageal tissues, causing esophagitis, feeling pain, difficulty swallowing, and chest pain.
   4. It is a genetic disease that leads to high acidity level in the esophagus.
2. **What medications are used in the management of GERD?**
3. Proton pump inhibitors such as Omeprazole, Esomeprazole (Nexium) or type II antihistamines such as Ranitidine (Zantac).
4. Analgesics such as Ibuprofen (Advil) or acetaminophen (Tylenol).
5. Laxatives for the treatment of constipation.
6. Antibiotics for bacteria.
7. **What are the common side effects of the Proton Pump Inhibitors (PPIs)?**
8. Headache, nausea, abdominal pain and diarrhea.
9. Loss of appetite.
10. Feeling hungry.
11. Drowsiness and dizziness.
12. Low blood sugar.

**Now, we are going to mention some statements about the Direct to Consumer Advertisement (DTCA) of over the counter (OTC) drugs and we would like to know your level of agreement with these statements:**

| **Statement** | **Level of Agreement** |
| --- | --- |
| 1. **DTCA is an informing tool about the benefits and harms of drugs.** | 1. Strongly agree |
| 1. Agree |
| 1. Neutral |
| 1. Disagree |
| 1. Strongly disagree |
|  | |
| 1. **DTCAs are credible source of information about the OTC drugs.** | 1. Strongly agree |
| 1. Agree |
| 1. Neutral |
| 1. Disagree |
| 1. Strongly disagree |
|  | |
| 1. **If the way DTCAs are presented is attractive and catches my eye it may encourage me to purchase the marketed OTC drug.** | 1. Strongly agree |
| 1. Agree |
| 1. Neutral |
| 1. Disagree |
| 1. Strongly disagree |
|  | |
| 1. **If I liked a DTCA about a certain OTC drug this may change my view about this drug.** | 1. Strongly agree |
| 1. Agree |
| 1. Neutral |
| 1. Disagree |
| 1. Strongly disagree |
|  | |
| 1. **My decision to buy an OTC drug is independent and is not influenced by DTCA.** | 1. Strongly agree |
| 1. Agree |
| 1. Neutral |
| 1. Disagree |
| 1. Strongly disagree |
|  | |
| 1. **The more frequently I watch DTCAs about a certain pharmaceutical product the more likely I will buy that product.** | 1. Strongly agree |
| 1. Agree |
| 1. Neutral |
| 1. Disagree |
| 1. Strongly disagree |
